# Supplementary material for: Anisotropic piezoresistive response of 3D-printed pressure sensor based on ABS/MWCNT nanocomposite
Source: PubMed Central journal article supplement — Sci Rep. 2024 Oct 25;14:25297. doi: 10.1038/s41598-024-76028-2 (PMC11511984; doi:10.1038/s41598-024-76028-2), 2024-10-25
Supplement: 41598_2024_76028_MOESM1_ESM.pdf [file 41598_2024_76028_MOESM1_ESM.pdf]

# Anisotropic Piezoresistive Response of 3D-Printed Pressure Sensor based on ABS/MWCNT Nanocomposite

Luciano J. B. Quaresma<sup>1,2</sup>, Dhonata S. C. Oliveira<sup>1,2</sup>, Rosielem S. Dias<sup>1,2</sup>, Kelly C. Alves<sup>1</sup>, Luiz G. D. Barros<sup>4,7</sup>, Gustavo Pessin<sup>5,6,7</sup>, Amilton Sinatora<sup>7</sup>, Waldeci Paraguassu<sup>1</sup>, Marcos A. L. Reis<sup>1,2,3</sup>

<sup>1</sup>Graduate Program in Materials Science and Engineering, Federal University of Pará, Ananindeua, PA, Brazil. <sup>2</sup>3D Nanostructuring Laboratory, Federal University of Pará, Belém, PA, Brazil. <sup>3</sup>Graduate Program in Amazon's Natural Resources Engineering, Federal University of Pará, Belém, PA, Brazil. <sup>4</sup>Mechanical Engineering Department, São Carlos School of Engineering, University of São Paulo, São Carlos, SP, Brazil. <sup>5</sup>Institute of Exact and Natural Sciences, Federal University of Pará, Belém, PA, Brazil. <sup>6</sup>Federal University of Ouro Preto, Ouro Preto, MG, Brazil. <sup>7</sup>Instituto Tecnológico Vale, Ouro Preto, MG, Brazil.

## Supplementary Information

Tab. 1 | **Commercial ABS Raman spectroscopy data.** The vibrational modes were grouped by region (R) and by respective Lorentzian (L) sequentially. The raw spectra as fitted with  $r^2=0.98535$ .

| Region-Lorentzian | Raman shift (cm <sup>-1</sup> ) | Intensity (a.u.) | FWHM (cm <sup>-1</sup> ) |
|-------------------|---------------------------------|------------------|--------------------------|
| R1-L1             | 989.17                          | 55.25            | 4.05                     |
| R1-L2             | 1001.38                         | 1240.40          | 4.44                     |
| R1-L3             | 1030.12                         | 146.24           | 4.86                     |
| R1-L4             | 1033.78                         | 155.06           | 7.31                     |
| R2-L5             | 1156.00                         | 64.65            | 7.06                     |
| R2-L6             | 1181.76                         | 69.15            | 8.84                     |
| R2-L7             | 1188.69                         | 24.07            | 8.84                     |
| R2-L8             | 1198.81                         | 90.35            | 19.22                    |
| R3-L9             | 1445.94                         | 66.05            | 16.75                    |
| R3-L10            | 1454.94                         | 34.86            | 16.85                    |
| R4-L11            | 1583.26                         | 73.32            | 5.44                     |
| R4-L12            | 1601.32                         | 138.49           | 7.43                     |
| R4-L13            | 1604.55                         | 78.92            | 5.02                     |
| R5-L14            | 1650.14                         | 15.26            | 20.43                    |
| R5-L15            | 1667.11                         | 29.93            | 7.35                     |
| R6-L16            | 1729.71                         | 43.62            | 15.77                    |
| R7-L17            | 2843.71                         | 63.34            | 14.96                    |
| R7-L18            | 2871.90                         | 43.67            | 30.77                    |
| R7-L19            | 2898.45                         | 65.49            | 31.68                    |
| R7-L20            | 2919.24                         | 115.70           | 34.50                    |
| R7-L21            | 2947.77                         | 126.71           | 25.57                    |
| R7-L22            | 2979.00                         | 37.79            | 15.78                    |
| R7-L23            | 3001.54                         | 48.36            | 30.46                    |
| R7-L24            | 3035.06                         | 45.60            | 23.01                    |
| R7-L25            | 3052.57                         | 92.95            | 12.81                    |
| R7-L26            | 3062.82                         | 128.45           | 19.36                    |

Tab. 2 | **As-received MWCNTs-COOH Raman spectroscopy data.** The raw spectra as fitted with  $r^2=0.99925$ .

| <b>CNTs Subband</b> | <b>Raman shift (cm<sup>-1</sup>)</b> | <b>Intensity (a.u.)</b> | <b>FWHM (cm<sup>-1</sup>)</b> |
|---------------------|--------------------------------------|-------------------------|-------------------------------|
| D*                  | 1134.30                              | 42.64                   | 133.61                        |
| D <sub>L</sub>      | 1285.62                              | 61.30                   | 129.30                        |
| D <sub>R</sub>      | 1325.58                              | 1328.59                 | 45.28                         |
| D <sub>LO</sub>     | 1405.40                              | 35.77                   | 102.67                        |
| D <sub>middle</sub> | 1494.47                              | 41.83                   | 93.28                         |
| G <sub>out</sub>    | 1575.15                              | 789.19                  | 39.10                         |
| G <sub>inn</sub>    | 1602.49                              | 206.58                  | 22.53                         |
| D'                  | 1613.22                              | 233.22                  | 19.59                         |
| D**                 | 2490.57                              | 24.89                   | 137.36                        |
| 2D <sub>L</sub>     | 2624.32                              | 118.62                  | 86.23                         |
| 2D <sub>R</sub>     | 2650.78                              | 278.06                  | 62.31                         |
| D+G                 | 2901.80                              | 45.39                   | 95.17                         |

Tab. 3 | **ABS/MWCNTs-COOH nanocomposite Raman spectroscopy data.** The vibrational modes were labelled as the individual materials. The dislocations are significant above 2  $\text{cm}^{-1}$ , considering equipment variations, and redshifts are represented by negative signs. The G\* subband was identified only in the nanocomposite spectra. The raw spectra as fitted with  $r^2=0.99439$ .

| Subband             | Raman shift ( $\text{cm}^{-1}$ ) | Intensity (a.u.) | FWHM ( $\text{cm}^{-1}$ ) | Dislocation ( $\text{cm}^{-1}$ ) |
|---------------------|----------------------------------|------------------|---------------------------|----------------------------------|
| R1-L1               | 987.99                           | 28.55            | 10.83                     | -1.18                            |
| R1-L2               | 1001.31                          | 711.86           | 4.56                      | -0.07                            |
| R1-L3               | 1029.75                          | 77.00            | 5.45                      | -0.38                            |
| R1-L4               | 1033.28                          | 113.29           | 7.00                      | -0.50                            |
| D*                  | Not identified                   |                  |                           |                                  |
| R2-L5               | 1156.53                          | 59.28            | 1.38                      | 0.54                             |
| R2-L6               | 1183.82                          | 52.22            | 4.00                      | 2.06                             |
| R2-L7               | 1193.41                          | 46.92            | 6.51                      | 4.72                             |
| R2-L8               | 1199.14                          | 61.53            | 6.73                      | 0.33                             |
| D <sub>L</sub>      | 1293.51                          | 55.96            | 31.54                     | 7.89                             |
| D <sub>R</sub>      | 1329.78                          | 1022.26          | 43.23                     | 4.20                             |
| D <sub>LO</sub>     | 1377.79                          | 68.29            | 73.63                     | -27.61                           |
| R3-L9               | 1447.64                          | 120.51           | 29.62                     | 1.70                             |
| R3-L10              | Not identified                   |                  |                           |                                  |
| D <sub>middle</sub> | 1508.89                          | 39.03            | 73.73                     | 14.42                            |
| G*                  | 1565.63                          | 133.20           | 36.09                     | --                               |
| G <sub>out</sub>    | 1583.03                          | 322.58           | 22.16                     | 7.88                             |
| R4-L11              | 1583.19                          | 41.50            | 3.13                      | -0.07                            |
| G <sub>inn</sub>    | 1601.92                          | 330.28           | 16.06                     | -0.57                            |
| R4-L12              | 1603.42                          | 45.63            | 3.98                      | 0.92                             |
| R4-L13              | Not identified                   |                  |                           |                                  |
| D'                  | 1618.02                          | 194.76           | 17.73                     | 4.80                             |
| R5-L14              | Not identified                   |                  |                           |                                  |
| R5-L15              | Not identified                   |                  |                           |                                  |
| R6-L16              | 1731.11                          | 28.81            | 11.27                     | 1.40                             |
| D**                 | Not identified                   |                  |                           |                                  |
| 2D <sub>L</sub>     | 2649.61                          | 123.24           | 93.34                     | 25.29                            |
| 2D <sub>R</sub>     | 2706.38                          | 89.70            | 89.44                     | 55.59                            |
| R7-L17              | 2844.82                          | 41.03            | 12.31                     | 1.12                             |
| R7-L18              | 2871.41                          | 30.06            | 26.77                     | -0.49                            |
| R7-L19              | 2895.79                          | 43.43            | 30.15                     | -2.67                            |
| D+G                 | Not identified                   |                  |                           |                                  |
| R7-L20              | 2917.02                          | 110.02           | 35.85                     | -2.22                            |
| R7-L21              | 2946.88                          | 107.37           | 28.91                     | -0.89                            |
| R7-L22              | 2979.93                          | 22.58            | 14.15                     | 0.92                             |
| R7-L23              | 3000.28                          | 23.74            | 22.58                     | -1.26                            |
| R7-L24              | 3034.12                          | 26.64            | 14.71                     | -0.94                            |
| R7-L25              | 3052.78                          | 81.35            | 13.04                     | 0.22                             |
| R7-L26              | 3062.71                          | 77.32            | 16.33                     | -0.11                            |

Tab. 4 | **Piezoresistive behavior in cycles of increasing pressure.** Mean values and standard deviations from three different samples per group of initial electrical resistance (R), sensitivity (S), response time ( $t_{res}$ ) and recovery time ( $t_{rec}$ ) for each cycle of 20 seconds with pressure (P) and 20 seconds without load.

|                       |           | <b>B group</b>     | <b>C group</b>    |
|-----------------------|-----------|--------------------|-------------------|
|                       | R         | 251.59 ± 105.17 kW | 366.51 ± 80.63 kW |
| Cycle 1               | S         |                    |                   |
| P = 68.27 ± 0.22 kPa  | $t_{res}$ | No response        |                   |
|                       | $t_{rec}$ |                    |                   |
| Cycle 2               | S         | 0.08 ± 0.03 %      | 0.07 ± 0.03 %     |
| P = 139.97 ± 0.46 kPa | $t_{res}$ | 0.68 ± 0.01 s      | 0.56 ± 0.20 s     |
|                       | $t_{rec}$ | 2.26 ± 1.87 s      | 5.76 ± 2.69 s     |
| Cycle 3               | S         | 0.22 ± 0.04 %      | 0.19 ± 0.06 %     |
| P = 213.41 ± 0.47 kPa | $t_{res}$ | 1.24 ± 0.98 s      | 1.24 ± 0.52 s     |
|                       | $t_{rec}$ | 3.95 ± 2.88 s      | 8.36 ± 2.54 s     |
| Cycle 4               | S         | 0.53 ± 0.25 %      | 0.33 ± 0.11 %     |
| P = 288.92 ± 0.29 kPa | $t_{res}$ | 6.10 ± 6.35 s      | 1.13 ± 1.09 s     |
|                       | $t_{rec}$ | 7.23 ± 1.53 s      | 9.60 ± 2.82 s     |
| Cycle 5               | S         | 0.75 ± 0.36 %      | 0.42 ± 0.12 %     |
| P = 363.25 ± 0.39 kPa | $t_{res}$ | 4.52 ± 6.36 s      | 1.02 ± 0.90 s     |
|                       | $t_{rec}$ | 10.84 ± 2.06 s     | 15.02 ± 1.41 s    |

Tab. 5 | **Piezoresistive behavior in cycles constant pressure.** Mean values and standard deviations from three different samples per group of mean sensitivity (S), mean response time ( $t_{res}$ ) and mean recovery time ( $t_{rec}$ ) for 20 cycles with 20 seconds of 363.25 ± 0.39 kPa pressure and 20 seconds without load.

|           | <b>B group</b> | <b>C group</b> |
|-----------|----------------|----------------|
| S         | 0.50 ± 0.10 %  | 0.38 ± 0.22 %  |
| $t_{res}$ | 0.69 ± 0.04 s  | 0.60 ± 0.08 s  |
| $t_{rec}$ | 14.17 ± 1.64 s | 15.93 ± 1.12 s |
